# Supplementary material
Source: HighWire-hosted journal article supplement (https://bmjopen.bmj.com/content/7/3/e013909)
Supplement: inline-supplementary-material-2 [file inline-supplementary-material-2.pdf]

Schedule of enrolment, interventions, and assessments.

|                                       | STUDY PERIOD    |            |                  |                  |                   |                    |
|---------------------------------------|-----------------|------------|------------------|------------------|-------------------|--------------------|
|                                       | Enrolment       | Allocation | Post-allocation  |                  |                   | Close-out          |
| TIMEPOINT                             | $-t_1$ (1 week) | 0          | $t_1$ (3 months) | $t_2$ (6 months) | $t_3$ (12 months) | $t_x$ ( 14 months) |
| <b>ENROLMENT:</b>                     |                 |            |                  |                  |                   |                    |
| Eligibility screen                    | X               |            |                  |                  |                   |                    |
| Facility Informed consent             | X               |            |                  |                  |                   |                    |
| Individual Informed Consent           | X               |            |                  |                  |                   |                    |
| Allocation                            |                 | X          |                  |                  |                   |                    |
| <b>INTERVENTIONS:</b>                 |                 |            |                  |                  |                   |                    |
| <i>[Treatment Arm]</i>                |                 |            | X                | X                |                   |                    |
| <i>[Control Arm]</i>                  |                 |            | X                | X                |                   |                    |
| <b>ASSESSMENTS:</b>                   |                 |            |                  |                  |                   |                    |
| <i>Baseline Variables</i>             |                 |            |                  |                  |                   |                    |
| Demographics                          |                 | X          | X                | X                |                   |                    |
| Past medical history                  |                 | X          | X                | X                |                   |                    |
| Number of medications                 |                 | X          | X                | X                |                   |                    |
| Presence of Dementia Diagnosis        |                 | X          | X                | X                |                   |                    |
| Presence of Advance Care Plan         |                 | X          | X                | X                |                   |                    |
| Documented Medical Power of Attorney  |                 | X          | X                | X                |                   |                    |
| Presence of Medical Power of Attorney | X               | X          | X                | X                |                   |                    |
| Barthel Index of Function             |                 | X          | X                | X                |                   |                    |
| Clinical Frailty Scale                |                 | X          | X                | X                |                   |                    |

|                                      |  |   |   |   |  |  |
|--------------------------------------|--|---|---|---|--|--|
| <b>Mini- mental state exam</b>       |  | X | X | X |  |  |
| <b>Geriatric Depression Scale</b>    |  | X | X | X |  |  |
| <b>Capacity assessment</b>           |  | X | X | X |  |  |
| <b>OUTCOME VARIABLES:</b>            |  |   |   |   |  |  |
| <b>Completion of GOPC process</b>    |  |   | X | X |  |  |
| <b>ED attendances and admissions</b> |  |   | X | X |  |  |
| <b>Length of stay</b>                |  |   | X | X |  |  |
| <b>Outpatient visits</b>             |  |   | X | X |  |  |
| <b>Residential Inreach visits</b>    |  |   | X | X |  |  |
| <b>Date of death</b>                 |  |   | X | X |  |  |
| <b>Place of death</b>                |  |   | X | X |  |  |
| <b>Date of transfer</b>              |  |   | X | X |  |  |
