# Supplementary material
Source: HighWire-hosted journal article supplement (https://bmjopen.bmj.com/content/7/3/e013909)
Supplement: inline-supplementary-material-3 [file inline-supplementary-material-3.pdf]

| Outcome                                          | Hypothesis                                                                    | Outcome Measure                                                                     | Method of Analysis                                                        |
|--------------------------------------------------|-------------------------------------------------------------------------------|-------------------------------------------------------------------------------------|---------------------------------------------------------------------------|
| ED attendances /admissions                       | Decrease in hospitalisation in intervention group                             | Ed attendances and admissions per facility resident per time period                 | zero-inflated poisson regression model                                    |
| Length of Stay (LOS)                             | Decrease in LOS in intervention group                                         | Hospital bed-days per facility resident per time period                             | zero-inflated negative binomial model                                     |
| External mortality rate                          | Decrease in external mortality rate in intervention group                     | Proportion of deaths outside of RACF                                                | t-test or chi-squared test                                                |
| Acute healthcare utilisation                     | Decrease in acute healthcare utilisation in intervention group                | Acute hospital visits outside of Emergency Department and emergency admissions      | t-test or chi-squared test                                                |
| Healthcare costs                                 | Decrease in healthcare costs in intervention group                            | Comparison of costs of hospitalisation and or admission                             | t-test or chi-squared test                                                |
| Facilitation of healthcare decision making       | Improvement on the ease with which healthcare decisions are made by staff     | Direct questioning on whether the GOPC facilitated healthcare decision making       | Qualitative exploration using focus groups and semi-structured interviews |
| A change in level of conflict at times of crisis | A decreased in conflict about decisions between staff, residents and families | Direct questioning on whether the GOPC heled decrease conflict between stakeholders | Qualitative exploration using focus groups and semi-structured interviews |
